# Supplementary material for: Transcriptomic Profiling during the Post-Harvest of Heat-Treated Dixiland Prunus persica Fruits: Common and Distinct Response to Heat and Cold
Source: PubMed Central journal article supplement (PMC3516522; doi:10.1371/journal.pone.0051052), 2012-12-06
Supplement: pone.0051052.s001.pdf [file pone.0051052.s001.pdf]

**Table S1.** Principal quality parameters of Dixiland peach fruits at harvest (H); after 3 or 7 days along the normal ripening process at 20°C (H3 and H7, respectively); after the application of a heat treatment of 39°C for 3 days (HT) followed by 3 or 7 days at 20°C (HT3 and HT7, respectively) and after 3 or 5 days at 0°C following the harvest (R3 and R5, respectively).

| Parameter                          | Sample                   |                          |                          |                          |                          |                          |                          |                          |
|------------------------------------|--------------------------|--------------------------|--------------------------|--------------------------|--------------------------|--------------------------|--------------------------|--------------------------|
|                                    | H                        | H3                       | H7                       | HT                       | HT3                      | HT7                      | R3                       | R5                       |
| <b>Firmness (N)</b>                | 52.1 ± 6.5 <sup>a</sup>  | 40.2 ± 9.1 <sup>b</sup>  | 11.9 ± 2.9 <sup>c</sup>  | 53.0 ± 7.7 <sup>a</sup>  | 4.3 ± 1.2 <sup>d</sup>   | 4.5 ± 1.0 <sup>d</sup>   | 51.9 ± 5.8 <sup>a</sup>  | 50.9 ± 6.1 <sup>a</sup>  |
| <b>Ground Colour</b>               |                          |                          |                          |                          |                          |                          |                          |                          |
| <i>H</i> value                     | 103.1 ± 2.3 <sup>a</sup> | 99.9 ± 2.2 <sup>a</sup>  | 92.6 ± 2.6 <sup>b</sup>  | 92.4 ± 1.9 <sup>b</sup>  | 73.6 ± 6.0 <sup>c</sup>  | 72.8 ± 5.6 <sup>c</sup>  | 101.2 ± 2.5 <sup>a</sup> | 100.1 ± 3.3 <sup>a</sup> |
| <b>Pulp colour</b>                 |                          |                          |                          |                          |                          |                          |                          |                          |
| <i>H</i> value                     | 97.0 ± 2.0 <sup>a</sup>  | 95.8 ± 1.5 <sup>a</sup>  | 92.5 ± 1.4 <sup>b</sup>  | 93.3 ± 1.9 <sup>b</sup>  | 85.2 ± 2.5 <sup>c</sup>  | 79.2 ± 1.9 <sup>d</sup>  | 96.8 ± 2.5 <sup>a</sup>  | 96.0 ± 2.0 <sup>a</sup>  |
| <b>Soluble solids</b><br>(°Brix)   | 10.6 ± 0.9 <sup>ab</sup> | 11.6 ± 1.3 <sup>a</sup>  | 11.0 ± 1.1 <sup>ab</sup> | 10.3 ± 0.8 <sup>b</sup>  | 11.4 ± 1.2 <sup>ab</sup> | 11.5 ± 0.9 <sup>ab</sup> | 10.4 ± 0.9 <sup>ab</sup> | 10.8 ± 1.5 <sup>ab</sup> |
| <b>Acidity [H<sup>+</sup>] (M)</b> | 0.14 ± 0.01 <sup>a</sup> | 0.15 ± 0.01 <sup>a</sup> | 0.14 ± 0.01 <sup>a</sup> | 0.08 ± 0.01 <sup>b</sup> | 0.10 ± 0.01 <sup>c</sup> | 0.11 ± 0.02 <sup>c</sup> | 0.13 ± 0.02 <sup>a</sup> | 0.13 ± 0.03 <sup>a</sup> |

Different letters within each parameter indicate statistically significant differences.
