# Supplementary material for: Transcriptomic Profiling during the Post-Harvest of Heat-Treated Dixiland Prunus persica Fruits: Common and Distinct Response to Heat and Cold
Source: PubMed Central journal article supplement (PMC3516522; doi:10.1371/journal.pone.0051052), 2012-12-06
Supplement: pone.0051052.s002.pdf [file pone.0051052.s002.pdf]

**Table S2.** Unigene classification according to their GO “biological process” term assigned to the most similar *Arabidopsis* protein

| <b>Biological process</b>                       | <b>Induced unigenes</b>                                                   | <b>Repressed unigenes</b>                                                         |
|-------------------------------------------------|---------------------------------------------------------------------------|-----------------------------------------------------------------------------------|
| Unknown                                         | I6; I13; I15; I16; I17; I19;<br>I20; I21; I29; I38; I47; I50;<br>I56; I59 | R5; R6; R8; R12; R13; R19;<br>R21; R27; R31; R32; R33;<br>R34; R37; R39; R41; R44 |
| Protein modification                            | I9; I26; I27; I31; I36; I49                                               | R4; R9; R11; R17; R23; R42                                                        |
| Transcription and RNA metabolism                | I1; I2; I24; I44; I52; I55;<br>I57;                                       | R7; R14; R16; R38                                                                 |
| Translation                                     | I3; I21; I35                                                              | R10; R15                                                                          |
| Carbohydrate metabolic process                  | I30; I32; I40                                                             | R20; R28                                                                          |
| Vesicle-mediated transport                      | I43                                                                       | R30; R34; R35                                                                     |
| Metabolic process                               | I4; I11; I58                                                              | R25                                                                               |
| DNA structure                                   | I22; I48                                                                  | R22                                                                               |
| Biosynthetic process                            | I8                                                                        | R2                                                                                |
| Defense response                                | I53                                                                       | R3                                                                                |
| Response to cold, freezing and heat             | I12; I34; I39; I42; I46; I51;<br>I60                                      | none                                                                              |
| Lipid formation and metabolism                  | I37; I41; I45                                                             | none                                                                              |
| Response to auxin stimulus                      | I2; I5; I23                                                               | none                                                                              |
| Electron transport chain                        | I10; I14                                                                  | none                                                                              |
| Tricarboxylic acid cycle                        | I18                                                                       | none                                                                              |
| Photosynthesis                                  | I28                                                                       | none                                                                              |
| Response to Pi starvation                       | I54                                                                       | none                                                                              |
| H <sub>2</sub> O <sub>2</sub> catabolic process | I7                                                                        | none                                                                              |
| Fruit development                               | I33                                                                       | none                                                                              |
| Cell death                                      | I25                                                                       | none                                                                              |
| Cell growth                                     | none                                                                      | R1; R29                                                                           |
| Response to carbohydrate stimulus               | none                                                                      | R39                                                                               |
| Response to nitrate                             | none                                                                      | R18                                                                               |
| Response to cadmium ion                         | none                                                                      | R26                                                                               |
| Signalling                                      | none                                                                      | R24                                                                               |
