# Supplementary material for: Transcriptomic Profiling during the Post-Harvest of Heat-Treated Dixiland Prunus persica Fruits: Common and Distinct Response to Heat and Cold
Source: PubMed Central journal article supplement (PMC3516522; doi:10.1371/journal.pone.0051052), 2012-12-06
Supplement: pone.0051052.s003.pdf [file pone.0051052.s003.pdf]

**Table S3.** Unigene classification according to their GO “molecular function” term assigned to the most similar *Arabidopsis* protein.

| <b>Molecular function</b>              | <b>Induced unigenes</b>                     | <b>Repressed unigenes</b>                                                   |
|----------------------------------------|---------------------------------------------|-----------------------------------------------------------------------------|
| Unknown                                | I13; I15; I17; I27; I28; I37; I38; I43; I56 | R5; R7; R8; R12; R13; R18; R21; R27; R31; R32; R33; R34; R37; R39; R41; R44 |
| Transcription factor activity          | I1; I2; I42; I44; I52; I55; I57             | R1; R14                                                                     |
| DNA binding                            | I16; I22; I24; I48                          | R22; R38                                                                    |
| Protein binding                        | I26; I41; I53; I54                          | R3; R9                                                                      |
| Kinase activity                        | I20; I31; I49                               | R11; R17; R23                                                               |
| Structural constituent of ribosome     | I3; I21; I35;                               | R15                                                                         |
| Hydrolase activity                     | I30; I33                                    | R20                                                                         |
| Transferase activity                   | I32; I59                                    | R43                                                                         |
| RNA binding                            | I29                                         | R16; R19                                                                    |
| Nucleotide binding                     | I47                                         | R26; R42                                                                    |
| Calmodulin binding                     | I25                                         | R24                                                                         |
| Lyase activity                         | I11                                         | R40                                                                         |
| Nucleotide exchange factor activity    | I23                                         | R29                                                                         |
| Phosphatase activity                   | I58                                         | R36                                                                         |
| Transporter activity                   | I60                                         | R2                                                                          |
| Electronic transfer activity           | I10; I12; I14                               | none                                                                        |
| ATP binding                            | I34; I39; I53                               | none                                                                        |
| Ubiquitin-protein ligase activity      | I9; I36                                     | none                                                                        |
| RNA helicase activity                  | I46; I50                                    | none                                                                        |
| Reductase activity                     | I7; I8                                      | none                                                                        |
| Carboxylase activity                   | I18                                         | none                                                                        |
| Decarboxylase activity                 | I4                                          | none                                                                        |
| Poligalacturonase activity             | I40                                         | none                                                                        |
| Zinc ion binding                       | I6                                          | none                                                                        |
| Acyl-CoA binding                       | I51                                         | none                                                                        |
| Lipid binding                          | I19                                         | none                                                                        |
| Fatty acid desaturase activity         | I45                                         | none                                                                        |
| Peptidase activity                     | none                                        | R4                                                                          |
| Enzyme inhibitor activity              | none                                        | R6                                                                          |
| Translation initiation factor activity | none                                        | R10                                                                         |
| Acetate-CoA ligase activity            | none                                        | R25                                                                         |
| Branching enzyme activity              | none                                        | R28                                                                         |

|                   |      |     |
|-------------------|------|-----|
| GTPase activity   | none | R30 |
| Receptor activity | none | R35 |
