# Supplementary material for: Transcriptomic Profiling during the Post-Harvest of Heat-Treated Dixiland Prunus persica Fruits: Common and Distinct Response to Heat and Cold
Source: PubMed Central journal article supplement (PMC3516522; doi:10.1371/journal.pone.0051052), 2012-12-06
Supplement: pone.0051052.s004.pdf [file pone.0051052.s004.pdf]

**Table S4.** GO Identification, obtained using the Blast2GO software [49], for some unigenes with unknown “biological process” and “molecular function” GO annotation (Additional Files 2 and 3). F: Molecular Function; P: Biological Process

| <b>Unigene</b> | <b>GO Id</b>                                                                                                                                                                                     |
|----------------|--------------------------------------------------------------------------------------------------------------------------------------------------------------------------------------------------|
| I6             | F: Zinc ion binding<br>P: Vesicle-mediated transport                                                                                                                                             |
| I14            | F: electron carrier activity<br>P: photorespiration; proteasome core complex assembly; response to misfolded protein; ubiquitin-dependent protein catabolic process                              |
| I15            | P: vernalization response                                                                                                                                                                        |
| I21            | F: structural constituent of ribosome<br>P: translation                                                                                                                                          |
| I29            | F: nucleic acid binding; RNA binding                                                                                                                                                             |
| I38            | F: transferring glycosyl groups<br>P: microtubule nucleation                                                                                                                                     |
| I50            | F: helicase activity, RNA binding; nucleic acid binding; ATP-dependent helicase activity; microtubule cytoskeleton organization<br>P: cytokinesis by cell plate formation; protein glycosylation |
| I56            | F: hydrolase activity; lyase activity                                                                                                                                                            |
| I59            | F: transferase activity, transferring glycosyl groups                                                                                                                                            |
| R6             | F: heme binding; iron ion binding; oxidoreductase activity, metal ion binding; monooxygenase activity<br>P: negative regulation of catalytic activity; oxidation-reduction process               |
| R13            | P: photorespiration                                                                                                                                                                              |
| R18            | P: Golgi vesicle transport; cellular membrane fusion; response to nitrate                                                                                                                        |
| R31            | P: response to stress; response to molecule of fungal origin                                                                                                                                     |
| R32            | P: vesicle-mediated transport                                                                                                                                                                    |
| R34            | P: vesicle-mediated transport; transport; cell plate formation involved in plant-type cell wall biogenesis                                                                                       |
| R39            | F: lyase activity<br>P: auxin mediated signaling pathway                                                                                                                                         |
| R41            | F: RNA binding; nucleic acid binding; ribonuclease H activity<br>P: DNA integration; RNA-dependent DNA replication                                                                               |
| R44            | P: tryptophan catabolic process; indoleacetic acid biosynthetic process                                                                                                                          |
