# Supplementary material for: Transcriptomic Profiling during the Post-Harvest of Heat-Treated Dixiland Prunus persica Fruits: Common and Distinct Response to Heat and Cold
Source: PubMed Central journal article supplement (PMC3516522; doi:10.1371/journal.pone.0051052), 2012-12-06
Supplement: pone.0051052.s005.pdf [file pone.0051052.s005.pdf]

**Table S5.** Decameric primers employed for the Differential Display analysis

| <b>Primer</b> | <b>Sequence</b> | <b>Melting temperature<br/>(°C)</b> |
|---------------|-----------------|-------------------------------------|
| A1            | 5'CCCAAGGTCC3'  | 34                                  |
| A2            | 5'GGTGCGGGAA3'  | 34                                  |
| A3            | 5'AAGACCCCTC3'  | 32                                  |
| A4            | 5'CTTCACCCGA3'  | 32                                  |
| A5            | 5'CACCAGGTGA3'  | 32                                  |
| A6            | 5'GAGTCTCAGG3'  | 32                                  |
| A7            | 5'CCCGATTTCGG3' | 34                                  |
| A8            | 5'ACGCACAACC3'  | 32                                  |
| A9            | 5'CTAATGCCGT3'  | 30                                  |
| A10           | 5'ACGGCGTATG3'  | 32                                  |
| B1            | 5'TCGAAGTCCT3'  | 30                                  |
| B2            | 5'GCATGTCAGA3'  | 30                                  |
| B3            | 5'ACTTCGACAA3'  | 32                                  |
| B4            | 5'TGCCATCAGT3'  | 30                                  |
| B5            | 5'GCGCTCACGC3'  | 36                                  |
| B6            | 5'GTGACATGCC3'  | 32                                  |
| B7            | 5'AGATCGAGCC3'  | 32                                  |
| B8            | 5'TCACCACGGT3'  | 32                                  |
| B9            | 5'ATGGCTCAGC3'  | 32                                  |
| B10           | 5'CAGGCACTAG3'  | 32                                  |
