# Supplementary material for: Transcriptomic Profiling during the Post-Harvest of Heat-Treated Dixiland Prunus persica Fruits: Common and Distinct Response to Heat and Cold
Source: PubMed Central journal article supplement (PMC3516522; doi:10.1371/journal.pone.0051052), 2012-12-06
Supplement: pone.0051052.s006.pdf [file pone.0051052.s006.pdf]

**Table S6.** Primers employed for qRT-PCR validation and analysis under cold storage.

| <b>Primer</b> | <b>Forward</b>                       | <b>Reverse</b>                       |
|---------------|--------------------------------------|--------------------------------------|
| <i>I3</i>     | 5'CCCCGCACTCGTACTCTAAC3'             | 5'GGGTACTCGAACACAACATCC3'            |
| <i>I4</i>     | 5'GCCTTCCAGGTCCGTTATG3'              | 5'TGGCAGCAGAAACCCTAGAC3'             |
| <i>I10</i>    | 5'ATGCAGCCTCAACCAGAGAG3'             | 5'CGAACTACGTGGGAAAATGG3'             |
| <i>I11</i>    | 5'TGTCGAGAGACAGTAGCCACA3'            | 5'GTCCCTGGTGAGAACTTGAATG3'           |
| <i>I12</i>    | 5'TCAGGGTCCAGACCATTCTC3'             | 5'ACGGGTCACCGTTGAAGTC3'              |
| <i>I16</i>    | 5'CTGGGGCTATCTACTCCAAGT3'            | 5'GTCCAAACCAAACAAGCTAAGG3'           |
| <i>I18</i>    | 5'AGATTGAGGGCCAACATGAAG3'            | 5'CTGCTTCAGTGTATAGGCTTGG3'           |
| <i>I23</i>    | 5'GTGCAAGGAGCAGTTGATGTAG3'           | 5'TGTACCTCTTCACCCATGTGAC3'           |
| <i>I42</i>    | 5'GTCACATGAGGAGGCACAGA3'             | 5'ACCCTCCTACCGCTATTCTG3'             |
| <i>I46</i>    | 5'CGGACGGAACTTTGTCTCT3'              | 5'TGTCTTCTTTGGGGACCTTG3'             |
| <i>I51</i>    | 5'ACAGCAGAGATCAAGAGCAAGG3'           | 5'CTTAAGCCACACAAACCCAGTC3'           |
| <i>I60</i>    | 5'TCTCACTCTGCGGTGTCTTG3'             | 5'CATCATCCCTGTTGTTGGTG3'             |
| <i>R2</i>     | 5'TTCGATGCGATTGAAGACTG'3'            | 5'CTTCCTGTAATGCTTCTTGG3'             |
| <i>R7</i>     | 5'CAGAGCAAAGGAATCAAGTG3'             | 5'ATAGCCCATCGTATCTCTGA3'             |
| <i>R8</i>     | 5'CTACAAGGGGTTTCATTCAAAGC3'          | 5'GTCCTGCCCTTCATTTCTATTG3'           |
| <i>R12</i>    | 5'GGAAGTATCCTCGTTCTGG3'              | 5'GGCATGAGTGACACAAGGT3'              |
| <i>R14</i>    | 5'CATATGGCAGCATGTAGTTCTG3'           | 5'CTTCCTCATCCTTCCTCCTTT3'            |
| <i>R20</i>    | 5'CGGTGCACTAGTAGTTGGACAT3'           | 5'GTTACTTGGGAAGCACTTGGAC3'           |
| <i>R36</i>    | 5'GGCCTCTACCGGATTTCAA3               | 5'ACCTCTCCAGCGTCTGTATCTT3'           |
| <i>R42</i>    | 5'ACTGCTGGTTCTGATGGTTCTT3'           | 5'TAGTTCTTCGCGGTAGTTGGAT3'           |
| <i>R44</i>    | 5'CCTCCTCACATTCTCTGCTTCTC3           | 5'CAGAGGCTGAGGGCTTTGTAGTA3'          |
| <i>O1</i>     | 5'ATGCAGGGTGGCATTGTAG3'              | 5'TGGGATGGAAGATGAACAGC3'             |
| <i>O3</i>     | 5'CCACCATGCTCAATTCTCTC3'             | 5'GATCCTGTTCTTGGTGGTT3'              |
| <i>O9</i>     | 5'GGGAAGTACAAGAGTGTGGAGCAC<br>AGAG'3 | 5'CTTCTCCTCTGCTTCTTCTCCACCAG<br>TG'3 |
